# Supplementary material for: Identification of Differentially Expressed Proteins in Murine Embryonic and Postnatal Cortical Neural Progenitors
Source: PubMed Central journal article supplement (PMC2817745; doi:10.1371/journal.pone.0009121), 2010-02-09
Supplement: pone.0009121.s002.pdf [file pone.0009121.s002.pdf]

**Proteins Highly Expressed in E11.5 NS Compared to P0 NS and E11.5 Diff NS**

| Protein Name                                                                              | Gene Symbol         | UniProtKB/TrEMBL<br>Accession Number | Genebank Accession Number | Number of<br>Peptides | Sonar<br>Expect Value | Mascot<br>Mowse Score | Peptide<br>Sequence                                                                                                                                                                                                                                                                                                                                                       |
|-------------------------------------------------------------------------------------------|---------------------|--------------------------------------|---------------------------|-----------------------|-----------------------|-----------------------|---------------------------------------------------------------------------------------------------------------------------------------------------------------------------------------------------------------------------------------------------------------------------------------------------------------------------------------------------------------------------|
| Voltage-dependent anion channel 2                                                         | Vdac2               | Q99L98                               | BC003731                  | 4                     |                       | 107                   | LTL.SALVDGK<br>GFGFLVK<br>LTFDITFPNTGK<br>MCIPPSYADLGK                                                                                                                                                                                                                                                                                                                    |
| Neogenin                                                                                  | Neo1                | P97798                               | Y09535                    | 2                     |                       | 42                    | AAEREAGR<br>DVVASLVSTR                                                                                                                                                                                                                                                                                                                                                    |
| Sodium-calcium exchanger                                                                  | Slc8a1              | O35157                               | AF004666                  | 4                     | 2.8x10-2              |                       | IWNETVSNLTMALGSSAPEILLSVIEVCGHNFTAGDLGPSR<br>VGIIDDDIFEEDENFLVHLSNVR<br>IFFEQGTQCLENCGTVALTIMRR<br>LVALLVSHVDHITADTEAETGGNETTECTGSYYCK                                                                                                                                                                                                                                    |
| Neurotrophic tyrosine kinase receptor                                                     | TrkC                | Q6VNS1                               | AY336094                  | 2                     | 2.9x10-2              |                       | AGHSVIGMTR<br>MDVSLCPAK                                                                                                                                                                                                                                                                                                                                                   |
| Seizure related gene 6                                                                    | Sez6                | Q7TSK2                               | BC053011                  | 2                     | 6.0x10-2              |                       | AVAKAPAASSALDAHAAIFLPLVAMVLLVGGVYR<br>THPRPYNR                                                                                                                                                                                                                                                                                                                            |
| Adenylate cyclase, type IX                                                                | Adcy9               | P51830                               | U30602                    | 5                     |                       | 46                    | TFDNLK<br>CFPQTORR<br>DLEVEKALKER<br>FDSMNL EEACLER<br>AIEQFCQEKEMVNMNR<br>DSFQASGYPGLELTLDDPTCKAK<br>GTMGRPOEVHVLNLR                                                                                                                                                                                                                                                     |
| TGF-beta receptor type III                                                                | Tgfr3               | O88393                               | BC070428                  | 2                     | 2.2x10-2              |                       | LLLLGAGESGK<br>TTGIVETHFTFK                                                                                                                                                                                                                                                                                                                                               |
| Guanine nucleotide-binding protein G(o), alpha subunit 1                                  | Gnao1               | P18872                               | M36777                    | 2                     |                       | 77                    | ILLGAGESGK<br>VLLGDPGVGK<br>DKTIMWK                                                                                                                                                                                                                                                                                                                                       |
| Guanine nucleotide-binding protein, alpha-12, alpha-13 subunit                            | Gna12/Gna13         | P27600                               | M63659                    | 1                     |                       | 65                    |                                                                                                                                                                                                                                                                                                                                                                           |
| GTP-binding protein REM 1                                                                 | Rem1                | O35929                               | U91601                    | 1                     |                       | 50                    |                                                                                                                                                                                                                                                                                                                                                                           |
| Guanine nucleotide binding protein, beta 2, related sequence 1                            | Gnb2-rs1            | Q5NCC6                               | AL645849                  | 2                     |                       | 97                    |                                                                                                                                                                                                                                                                                                                                                                           |
| Guanine nucleotide-binding protein beta subunit-like protein (RACK1)                      | Gnb2l1              | Q9CSQ0                               | AK012242                  | 3                     |                       | 93                    | DVLSVAFSSDNR<br>IIVDELK<br>DVLVAFSSDNR<br>IIVDELKQEVISTSSK<br>TRPVLLHAAADSEAQR<br>IGPLPWLWAAR<br>FDGAR<br>AAAKSAJAR<br>MPLNIISDYSVVVAVLALETAGNFQSSPVSEILR<br>LQYVHVSIDTSSGVLHASPLTGEK<br>ACPPCAPTCK<br>GRLPDCCHECCAAGCTGPK<br>KIHPPQVMSEFRGRQVY<br>IITVPPFLAYGEEGDGK<br>TLHQGDGLECMAMTIQILLK<br>DSNYHLLMSVQESLER<br>ELEDKFLQHGSLGFPK<br>IAEAGANGPTTPEADKIFLER<br>LGEVLLSR |
| Similar to interleukin 17 receptor E isoform 1                                            | Il17re              | Q6A251                               | BC078742                  | 2                     | 3.6x10-2              |                       |                                                                                                                                                                                                                                                                                                                                                                           |
| Hypothetical protein C6B12.02c in chromosome 1                                            | SPAC6B12.02c        | O14207                               | Z98531                    | 2                     |                       | 43                    |                                                                                                                                                                                                                                                                                                                                                                           |
| Glycoprotein endo-alpha-1,2-mannosidase-like protein                                      | Gm50                | Q6P1J0                               | AAH65047                  | 2                     | 6.0x10-2              |                       |                                                                                                                                                                                                                                                                                                                                                                           |
| Receptor tyrosine-protein kinase erbB-2                                                   | Erb2                | Q6ZPE0                               | AK129487                  | 2                     |                       | 30                    |                                                                                                                                                                                                                                                                                                                                                                           |
| Alpha 3 catenin - Mus musculus adult male testis cDNA, RIKEN full-length enriched library | Cttna3              | Q8CON3                               | AK030166                  | 1                     |                       | 21                    |                                                                                                                                                                                                                                                                                                                                                                           |
| FK506 binding protein 9                                                                   | Fkbp9               | Q8OZZ6                               | BC043129                  | 1                     | 1.3x10-2              |                       |                                                                                                                                                                                                                                                                                                                                                                           |
| Coatamer epsilon subunit                                                                  | Cope                | O89079                               | NP_067513                 | 1                     | 9.0 x 10-2            |                       |                                                                                                                                                                                                                                                                                                                                                                           |
| Mus musculus 10 days neonate olfactory brain cDNA, RIKEN full-length enriched library     | Glud1               | Q8C273                               | AK089152                  | 4                     | 1.0x10-6              |                       |                                                                                                                                                                                                                                                                                                                                                                           |
| DNA-binding protein Ikaros                                                                | Znfn1a1             | Q03267                               | L03547                    | 4                     | 5.5x10-13             |                       |                                                                                                                                                                                                                                                                                                                                                                           |
| Enoyl-CoA hydratase, mitochondrial                                                        | Echs1               | Q8BH95                               | AK040391                  | 2                     | 1.7x10-4              |                       |                                                                                                                                                                                                                                                                                                                                                                           |
| Aldolase 1, A isoform                                                                     | Aldoa               | Q6NY00                               | BC066801                  | 3                     | 2.1x10-6              |                       |                                                                                                                                                                                                                                                                                                                                                                           |
| Mus musculus ES cells cDNA, RIKEN full-length enriched library                            | 2410129E14Rik/Tubb2 | Q9CWF2/Q7TMM9                        | AK010786/BC055441         | 6                     | 3.1x10-11             |                       |                                                                                                                                                                                                                                                                                                                                                                           |
| Brix domain containing protein 1                                                          | Bxdc1               | Q9JJ80                               | BC025093                  | 1                     |                       | 47                    |                                                                                                                                                                                                                                                                                                                                                                           |
| Sulfotransferase 1C1                                                                      | Sult1c1             | Q9D939                               | AY005469                  | 2                     | 9.8x10-3              |                       |                                                                                                                                                                                                                                                                                                                                                                           |
| 78 kDa glucose-regulated protein (Hsp70)                                                  | Hspa5 (Grp78)       | P20029                               | M19351                    | 4                     | 6.4 x10-4             |                       |                                                                                                                                                                                                                                                                                                                                                                           |
| Chaperonin containing TCP-1 theta subunit                                                 | Cct8                | Q9WVS5                               | BAA81879                  | 8                     | 5.6x10-17             |                       |                                                                                                                                                                                                                                                                                                                                                                           |
| T-complex protein 1, alpha subunit B                                                      | Cct1                | P11983                               | M12899                    | 3                     | 2.7x10-3              |                       |                                                                                                                                                                                                                                                                                                                                                                           |

|                                                           |               |        |                        |    |           |     |                                                                                                                                                                                                                                                                                                                                                                                                                                                                                                                                                                                                                                                                                                                                                                                                                                                                                                                                                                                                                                                                                                                                                                                                                                                                                                                                                                                                                                                                                                                                                                                                         |
|-----------------------------------------------------------|---------------|--------|------------------------|----|-----------|-----|---------------------------------------------------------------------------------------------------------------------------------------------------------------------------------------------------------------------------------------------------------------------------------------------------------------------------------------------------------------------------------------------------------------------------------------------------------------------------------------------------------------------------------------------------------------------------------------------------------------------------------------------------------------------------------------------------------------------------------------------------------------------------------------------------------------------------------------------------------------------------------------------------------------------------------------------------------------------------------------------------------------------------------------------------------------------------------------------------------------------------------------------------------------------------------------------------------------------------------------------------------------------------------------------------------------------------------------------------------------------------------------------------------------------------------------------------------------------------------------------------------------------------------------------------------------------------------------------------------|
| T-complex protein 1, beta subunit                         | Cct2          | P80314 | Z31553                 | 8  | 7.0x10-9  |     | YINENLIINTDELGR<br>DAALMVTNDGATILK<br>QVLLSAAEAAEVLIR<br>GATQQILDEAER<br>LSSFIGAIAIGDLVK<br>LALVTGGEIASTFDHPELVK<br>VQDDEVGDGTTSVTVLAAELLR<br>ILKHGINCFINR<br>AETAR<br>LGFAGVVOEISFGTTK<br>DVDFELIKVEGK<br>GSNDMQYQHVIETLIGK<br>AVTIFIR<br>LMVELSK<br>ENAPAIIFIDEIDAIATK<br>EAVLEPLTHFELYK<br>MNLSEEVLEDYVARPDK<br>LIFSTITSK<br>IQDEIPALSVSRPQTGLSFLGPEPEDEDLYSR<br>ILLELLNQMDGFDQNVVVK<br>LQQUELEFLEVQEEYIKDEQK<br>ENAPAIIFIDEIDAIATK<br>IQDEIPALSVSRPQTGLSFLGPEPEDEDLYSR<br>MNLSEEVLEDYVARPDK<br>GATELTHEDYMEGILEVQAK<br>APSIIFIDELDAIGTK<br>QTYFLPVIGLVDAEK<br>EKAPSIIFIDELDAIGTK<br>LAGPQLVQMFIDGAK<br>VDILDALLR<br>TTIMAVQFDGGVVLGADSR<br>SGSAADTQAVADAVTYQLGFHSIELNEPPLVHTAASLFK<br>QVLLGDQIPK<br>LFQVEYIAEIAK<br>AIGSASEGAQSSLQEVYHK<br>ITSPLMEPSSIEK<br>QVLQGMVIDEELLGDGHSYSPR<br>TQNPMVVTGTSVLGK<br>VNNSTMLGASGDYADFQYLK<br>LFIGGLSFETTEESLR<br>IDTIEITDR<br>GGGNGFGPGGSNFR<br>ITGEAFVQFASQELAEK<br>DLAGSIIGK<br>GGDLMAFYDR<br>VVLGGKPKDR<br>GSDFDCELR<br>NTDEMVELR<br>NLPLPPPPPPR<br>IDEPLEGSSEDR<br>SRNTDEMVELR<br>LFQECPPHSTDR<br>RPAADMEEEEQAFKR<br>TDYNASVSVDPSSGPER<br>GCTATLGNFAK<br>GVVQDLQQAISK<br>TPAGLQVLNDYLADK<br>QETSLTSHDLFDIDPVVARSVYHLEDIVR<br>LFLQFVTGSPR<br>IDQYQGADAVGLEEK<br>GYMDLMPFINK<br>IFINLPR<br>SEPTQALELTEDDIKEDGIVPLR<br>MVGKVPVGSDFDFQPELSGAGSR<br>LAVEALSSLDGDLGSR<br>FCTGLTQIETLFK<br>LEQGQAIDDLMPAQK<br>LGFSEVELVQMVVDGK<br>SMTEAEQQQLIDHFLFDKPVSPLLASGMAR<br>GTGGVDTAAVGGVFDVSNADR<br>VLTPELYAELR<br>TDLNPNLQGGDDLDPNVYLSSR<br>MPFNSNSHTQK<br>QELLKANGEIK<br>QELLKANGEIKHVSSLLAKMEK<br>ANVGK<br>ANVGKLLK<br>CMIDQAHQEERPIR<br>YNPENLATLER<br>KGVAINMVTEEDKR |
| T-complex protein 1, epsilon subunit                      | Cct5          | P80316 | Z31555                 | 5  | 1.8x10-10 |     |                                                                                                                                                                                                                                                                                                                                                                                                                                                                                                                                                                                                                                                                                                                                                                                                                                                                                                                                                                                                                                                                                                                                                                                                                                                                                                                                                                                                                                                                                                                                                                                                         |
| 26S protease regulatory subunit 4                         | Psmc1         | P62192 | NP_032973.1            | 6  | 7x10-7    |     |                                                                                                                                                                                                                                                                                                                                                                                                                                                                                                                                                                                                                                                                                                                                                                                                                                                                                                                                                                                                                                                                                                                                                                                                                                                                                                                                                                                                                                                                                                                                                                                                         |
| 26S protease regulatory subunit 6B                        | Psmc4         | P54775 | AB040869               | 4  | 3.5x10-5  |     |                                                                                                                                                                                                                                                                                                                                                                                                                                                                                                                                                                                                                                                                                                                                                                                                                                                                                                                                                                                                                                                                                                                                                                                                                                                                                                                                                                                                                                                                                                                                                                                                         |
| 26S protease regulatory subunit 6A                        | Psmc3         | O88685 | AB040858               | 6  | 2.0x10-10 |     |                                                                                                                                                                                                                                                                                                                                                                                                                                                                                                                                                                                                                                                                                                                                                                                                                                                                                                                                                                                                                                                                                                                                                                                                                                                                                                                                                                                                                                                                                                                                                                                                         |
| Proteasome subunit beta type 6                            | Psmb6         | Q60692 | MMU13393               | 3  | 1.6x10-10 |     |                                                                                                                                                                                                                                                                                                                                                                                                                                                                                                                                                                                                                                                                                                                                                                                                                                                                                                                                                                                                                                                                                                                                                                                                                                                                                                                                                                                                                                                                                                                                                                                                         |
| Proteasome subunit alpha type 5                           | Psma5         | Q92ZU1 | AF019661               | 3  | 1.1x10-4  |     |                                                                                                                                                                                                                                                                                                                                                                                                                                                                                                                                                                                                                                                                                                                                                                                                                                                                                                                                                                                                                                                                                                                                                                                                                                                                                                                                                                                                                                                                                                                                                                                                         |
| Proteasome beta 4 subunit                                 | Psmb4         | Q91VV7 | NP_032971              | 3  | 2.3x10-2  |     |                                                                                                                                                                                                                                                                                                                                                                                                                                                                                                                                                                                                                                                                                                                                                                                                                                                                                                                                                                                                                                                                                                                                                                                                                                                                                                                                                                                                                                                                                                                                                                                                         |
| Heterogeneous nuclear ribonucleoproteins A2/B1            | Hnrpa2b1      | O88569 | AF073993               | 3  | 2.4x10-10 |     |                                                                                                                                                                                                                                                                                                                                                                                                                                                                                                                                                                                                                                                                                                                                                                                                                                                                                                                                                                                                                                                                                                                                                                                                                                                                                                                                                                                                                                                                                                                                                                                                         |
| Heterogeneous nuclear ribonucleoprotein F                 | Hnrpf         | Q92ZX1 | BC018185               | 1  | 4.1x10-2  |     |                                                                                                                                                                                                                                                                                                                                                                                                                                                                                                                                                                                                                                                                                                                                                                                                                                                                                                                                                                                                                                                                                                                                                                                                                                                                                                                                                                                                                                                                                                                                                                                                         |
| Heterogeneous nuclear ribonucleoprotein K (Hnrpk protein) | Hnrpk         | Q5FWJ5 | BC089328               | 11 |           | 486 |                                                                                                                                                                                                                                                                                                                                                                                                                                                                                                                                                                                                                                                                                                                                                                                                                                                                                                                                                                                                                                                                                                                                                                                                                                                                                                                                                                                                                                                                                                                                                                                                         |
| Ribosomal protein S2                                      | Rps2          | Q9DC49 | AK004568               | 1  |           | 57  |                                                                                                                                                                                                                                                                                                                                                                                                                                                                                                                                                                                                                                                                                                                                                                                                                                                                                                                                                                                                                                                                                                                                                                                                                                                                                                                                                                                                                                                                                                                                                                                                         |
| Elongation factor 1-delta                                 | Eef1d         | P57776 | BAB30841.1 or AAG17466 | 1  | 8.9x10-3  |     |                                                                                                                                                                                                                                                                                                                                                                                                                                                                                                                                                                                                                                                                                                                                                                                                                                                                                                                                                                                                                                                                                                                                                                                                                                                                                                                                                                                                                                                                                                                                                                                                         |
| Elongation factor 1-beta                                  | Eef1b         | O70251 | BC039635               | 1  | 9.4x10-4  |     |                                                                                                                                                                                                                                                                                                                                                                                                                                                                                                                                                                                                                                                                                                                                                                                                                                                                                                                                                                                                                                                                                                                                                                                                                                                                                                                                                                                                                                                                                                                                                                                                         |
| Trip12 protein                                            | Trip12        | Q99KN5 | NP_598736              | 2  | 3.0x10-2  |     |                                                                                                                                                                                                                                                                                                                                                                                                                                                                                                                                                                                                                                                                                                                                                                                                                                                                                                                                                                                                                                                                                                                                                                                                                                                                                                                                                                                                                                                                                                                                                                                                         |
| Thioredoxin-like protein 1                                | Txn1          | Q8CDN6 | AF052660               | 5  | 1.7x10-4  |     |                                                                                                                                                                                                                                                                                                                                                                                                                                                                                                                                                                                                                                                                                                                                                                                                                                                                                                                                                                                                                                                                                                                                                                                                                                                                                                                                                                                                                                                                                                                                                                                                         |
| Creatine kinase, B chain                                  | Ckb           | Q04447 | M74149                 | 9  | 4.2x10-19 |     |                                                                                                                                                                                                                                                                                                                                                                                                                                                                                                                                                                                                                                                                                                                                                                                                                                                                                                                                                                                                                                                                                                                                                                                                                                                                                                                                                                                                                                                                                                                                                                                                         |
| MKIAA4061 protein                                         | B230396K10Rik | Q5DTQ5 | AK220465               | 2  |           | 44  |                                                                                                                                                                                                                                                                                                                                                                                                                                                                                                                                                                                                                                                                                                                                                                                                                                                                                                                                                                                                                                                                                                                                                                                                                                                                                                                                                                                                                                                                                                                                                                                                         |
| Eukaryotic translation initiation factor 3, subunit 12    | Eif3s12       | Q58EU9 | BC091749               | 4  |           | 44  |                                                                                                                                                                                                                                                                                                                                                                                                                                                                                                                                                                                                                                                                                                                                                                                                                                                                                                                                                                                                                                                                                                                                                                                                                                                                                                                                                                                                                                                                                                                                                                                                         |
| Eukaryotic initiation factor 4A- I and II                 | Eif4a1        | P60843 | MMEIF4AI               | 1  |           | 61  |                                                                                                                                                                                                                                                                                                                                                                                                                                                                                                                                                                                                                                                                                                                                                                                                                                                                                                                                                                                                                                                                                                                                                                                                                                                                                                                                                                                                                                                                                                                                                                                                         |

|                                         |        |        |          |   |          |                                                                                                                                                                                                 |
|-----------------------------------------|--------|--------|----------|---|----------|-------------------------------------------------------------------------------------------------------------------------------------------------------------------------------------------------|
| Calreticulin                            | Calr   | P14211 | BC003453 | 4 | 133      | FYALSAK<br>LFPSGLDQK<br>VHVIFNYK<br>FYGDELEKDK<br>GILTLK<br>AVFFPSIVGR<br>GYSFTTTAER<br>EITALAPSTMK<br>QEYDESGPSIVHR<br>SYELPDGQVITIGNER<br>VAPEEHPVLLTEAPLNPK<br>TTGIVMDSGDGVTHTVPIEGYALPHAILR |
| Actin, cytoplasmic 2                    | Actg1  | P63260 | X13055   | 8 | 202      | TIDDLKDLK<br>IQLVEEELDR<br>ALKDEEKMELEQIQLK<br>LLLNNDNLLR<br>KVDGQQTIIACIESHQFOAK<br>IVEAAENEYQTAISENYQTMSDITTFK                                                                                |
| Tropomyosin 3, gamma                    | Tpm3   | Q8K0Z5 | BC029186 | 3 | 84       | GDLGIEPAEK<br>NTGIICTGPASR<br>GVVDSDELPLNISR<br>ADLNINLGTIAK<br>TLTLVDVTGIGMTK<br>IDIIPNPQER<br>ALLFIPR<br>RAPDFLFENK                                                                           |
| F-actin capping protein alpha-2 subunit | Capza2 | P47754 | U16741   | 3 | 35       |                                                                                                                                                                                                 |
| Pyruvate kinase, isozyme M2             | Pkm2   | P52480 | D38379   | 2 | 84       |                                                                                                                                                                                                 |
| Heat shock protein HSP 90-beta          | Hspcb  | P11499 | M36829   | 6 | 4.0x10-9 |                                                                                                                                                                                                 |

**Proteins Highly Expressed in P0 NS Compared to E11.5 NS and E11.5 Diff NS**

| Protein Name                                                                       | Gene Symbol   | UniProtKB/TrEMBL<br>Accession Number | Genebank Accession Number | Number of<br>Peptides | Sonar<br>Expect Value | Mascot<br>Mowse Score |                                                                                                                                                                                                                                                                                                                                                                           |
|------------------------------------------------------------------------------------|---------------|--------------------------------------|---------------------------|-----------------------|-----------------------|-----------------------|---------------------------------------------------------------------------------------------------------------------------------------------------------------------------------------------------------------------------------------------------------------------------------------------------------------------------------------------------------------------------|
| Cyclic nucleotide gated channel alpha 2                                            | Cnga2         | Q80XH6                               | BC048775                  | 2                     |                       | 33                    | DGEGKGTKKK<br>GPELQTVTTHQGDGK<br>WSATPPTCK<br>IPERGNMTCCLHSAK<br>LYPEGLAGLAR<br>LLFEGAGSNPGDK<br>LIQELAK<br>LEETLPVIR<br>LPLLPHEVR<br>LLNFPTIVER<br>TTCSCSLAVQLSK<br>ALSCPGQPSK<br>KGAMDELERALSCPGQPSK<br>CIVQVITPTSSR<br>EGTRCIVQVITPTSSR                                                                                                                                |
| Selectin P                                                                         | SELP          | Q5TI45                               | AL022146                  | 2                     |                       | 32                    | SGYLLPDTK<br>IYFMAGSSR<br>EAESSPFVER<br>EGVKFDESEKTK<br>LYDGLFK<br>LPMILLEK<br>QSGESIDITR<br>NINLIVQK<br>KGEIFELK<br>LLSTDPVAAK<br>GLEISGTFTR<br>LOSSNIFTVAK<br>AELNSDKKEKK<br>DCPLNTEAASNK<br>MEPLNNLQVAVK<br>IQPGNPSFTLSLK<br>QAGSISMDLQLTNK<br>NVEGQDMLYQSLK<br>LGTWLPR<br>AYHMVCLDPDMEK<br>AYHMVCLDPDMEKAPEGK<br>GFSDFR<br>HVRGILLYGPPGCGK<br>QTTVIQDLK<br>GKAAVLDLEK |
| ATPase, H+ transporting, V0 subunit D isoform 1                                    | Atp6v0d1      | Q921S5                               | BC011075                  | 2                     |                       | 108                   |                                                                                                                                                                                                                                                                                                                                                                           |
| Arsenical pump-driving ATPase                                                      | Asna1         | O54984                               | AF039405                  | 5                     |                       | 296                   |                                                                                                                                                                                                                                                                                                                                                                           |
| Mothers against decapentaplegic homolog 9 (smad8/smad9)                            | Smad9         | Q8JIW5                               | AF175408                  | 2                     |                       | 42                    |                                                                                                                                                                                                                                                                                                                                                                           |
| Down-regulated by Ctnnb1, a                                                        | Drcnbnb1a     | Q6P9N1                               | BC060692                  | 2                     |                       | 32                    |                                                                                                                                                                                                                                                                                                                                                                           |
| Mus musculus adult male medulla oblongata cDNA, RIKEN full-length enriched library | Tra1          | Q8CCY5                               | AK031918                  | 4                     |                       | 133                   |                                                                                                                                                                                                                                                                                                                                                                           |
| Damage-specific DNA binding protein 1                                              | Ddb1          | Q9WV39                               | AF159853                  | 3                     |                       | 77                    |                                                                                                                                                                                                                                                                                                                                                                           |
| Adaptor protein complex AP-1, beta 1 subunit                                       | Ap1b1         | Q5SVG4                               | AL645522                  | 11                    |                       | 593                   |                                                                                                                                                                                                                                                                                                                                                                           |
| Mus musculus 2 days neonate thymus cDNA, RIKEN full-length enriched library        | 5330429B09Rik | Q8C2C1                               | AK088897                  | 1                     |                       | 22                    |                                                                                                                                                                                                                                                                                                                                                                           |
| Chromodomain helicase-DNA-binding protein 4 (CHD-4)                                | Chd4          | Q8BM83                               | AK034549                  | 2                     |                       | 25                    |                                                                                                                                                                                                                                                                                                                                                                           |
| N-ethylmaleimide sensitive fusion protein                                          | Nsf           | Q923C6                               | BC006627                  | 2                     |                       | 38                    |                                                                                                                                                                                                                                                                                                                                                                           |
| Early endosome antigen 1                                                           | Eea1          | Q8BL66                               | AK046231                  | 2                     |                       | 31                    |                                                                                                                                                                                                                                                                                                                                                                           |

**Proteins Highly Expressed in Both E11.5 NS and P0 NS Compared to E11.5 Diff NS**

| Protein Name                                                             | Gene Symbol | UniProtKB/TrEMBL<br>Accession Number | Genebank Accession Number | Number of<br>Peptides | Sonar<br>Expect Value | Mascot<br>Mowse Score |               |
|--------------------------------------------------------------------------|-------------|--------------------------------------|---------------------------|-----------------------|-----------------------|-----------------------|---------------|
| Veph-A, Veph-B protein<br>(Il-6 superfamily) B-cell stimulating factor-3 | Veph1       | Q8K4P6                               | AB085187                  | 1                     |                       | 35                    | RDRSLPR       |
| Atp5b protein                                                            | Bsf3        | Q9QZM3                               | AF176913                  | 1                     |                       | 26                    | LGAETLPR      |
|                                                                          | Atp5b       | Q8CI65                               | BC037127                  | 12                    | 3.7x10-28             |                       | TVLIMELINNVAK |

|                                                          |        |        |             |   |           |                                                                                                                                                                                                                                                                                                                                                                                                                                                                                                                                                                                                                                                                                                                                                                                                                                                                                                                                                                                                                                                                                                                                                                                                                                                                                                                                                                                                                                                                                                                                                                                 |
|----------------------------------------------------------|--------|--------|-------------|---|-----------|---------------------------------------------------------------------------------------------------------------------------------------------------------------------------------------------------------------------------------------------------------------------------------------------------------------------------------------------------------------------------------------------------------------------------------------------------------------------------------------------------------------------------------------------------------------------------------------------------------------------------------------------------------------------------------------------------------------------------------------------------------------------------------------------------------------------------------------------------------------------------------------------------------------------------------------------------------------------------------------------------------------------------------------------------------------------------------------------------------------------------------------------------------------------------------------------------------------------------------------------------------------------------------------------------------------------------------------------------------------------------------------------------------------------------------------------------------------------------------------------------------------------------------------------------------------------------------|
|                                                          |        |        |             |   |           | IMDPNIVGNEHYDVAR<br>VLDSGAPIKIPVGPETLGR<br>TIAMDGTEGLVR<br>LDATTVLSR<br>VVDLLAPYAK<br>FLSOPFGVAEVFTGHMGK<br>SLQDIILGMDLSEEDKLTVSR<br>IMNVIGEPIDER<br>LVPLKETIK<br>GLAGTOPFGGSATGAR<br>IPSAVGYOPTLATDMGTQER<br>GLLLYGGPTGK<br>QEVYTAWPVAGFPGGK<br>IIVDELKQEVISTSSK<br>DETNYGIPQR<br>TIIMWK<br>LLGPDAAINLADPDGALAK<br>TPEELSAIK<br>VLTEIASR<br>GTVTDFPFGFDGR<br>VIHDFNGIVEGLMAVHAITGQK<br>VIISAFSADAPMFVVGYNHEK<br>AAVPSASTSIVLELR<br>LAMQEFMLPVGASSFR<br>FYTEDGNWDLVGNNTPIFFIR<br>VDFPQDLATLTGR<br>VAVLGASGGIGQPLSLLK<br>TIIPLISQCTPK<br>IFGVTTLDIVR<br>NAPAIIFIDEIDAIPK<br>IVSOLLTMDGLK<br>LDQLIYIPLPDEK<br>NVFIIGATNRPDIIDPAIRPGR<br>MTNGFSGADLTEICQR<br>GVLFYGGPPCGK<br>MDELQLFR<br>GVVSDDLLPLNVSR<br>TDDEVVQREEEAQLDGLNASQIR<br>ESDDPMAYIHFTAEGEVTFK<br>FAFOAEVNR<br>ELISNASDALDKIR<br>DDEVVDVGTVEEDLGK<br>EEASDYLELDTIK<br>DAGTIAGLNVLK<br>TTPSYVAFTDTER<br>INEPTAAAIAYGLDK<br>NQVAMNPTNTVFDK<br>INEPTAAAIAYGLDKK<br>TSFFQALGITTK<br>VLALSIVETEYTFPLAEK<br>AFLADPSAFAAAAATAAPAAAAAPAK<br>IIQLLDDYPK<br>GTIELSDVQLIK<br>NIEDVIAQGVK<br>YVASYLALGNGNSSPSAK<br>AIVAIENPADVSVISSR<br>FTPGTFTNQIAAFR<br>FAAATGATPIAGR<br>SDGIYIINLK<br>KSDGIYIINLK<br>LLVVTDPK<br>FTPGTFTNQIAAFREPR<br>FLAAGTHLGGTNLDFQMEQYIYK<br>AIVAIENPADVSVISSR<br>SDGIYIINLK<br>KSDGIYIINLK<br>MHVMDVQGSTEASAIKDYVVK<br>VEGFPTIYFAPSGDK<br>RFDVSGYPTLK<br>DLGLSESGEDVNAALDESGKK<br>GRPFYNGPR<br>VDATESDLAQQYGVK<br>QFLLAEEAIDIPFGITNSGVFSK<br>VLVGANFEEVAFDEKK<br>YQLDKDGVVLFK<br>HNQLPLVIEFTEQTAPK<br>GSTAPVGGSFPTITPR<br>LAAVDATVNVQLASR<br>TGEAIVDAALSALR<br>SDVLELTDENFESR<br>52 FLEQONK<br>FADLSEAAANR |
| Spermatogenesis associated factor                        | Spata5 | Q9CXZ7 | AK011111    | 2 | 4.0x10-2  |                                                                                                                                                                                                                                                                                                                                                                                                                                                                                                                                                                                                                                                                                                                                                                                                                                                                                                                                                                                                                                                                                                                                                                                                                                                                                                                                                                                                                                                                                                                                                                                 |
| Guanine nucleotide-binding protein beta subunit 2-like 1 | Gnb21  | P68040 | BC046760    | 3 | 9.0x10-3  |                                                                                                                                                                                                                                                                                                                                                                                                                                                                                                                                                                                                                                                                                                                                                                                                                                                                                                                                                                                                                                                                                                                                                                                                                                                                                                                                                                                                                                                                                                                                                                                 |
| Dynactin subunit 2                                       | Dctn2  | Q99KJ8 | BC004613    | 1 | 1.3x10-3  |                                                                                                                                                                                                                                                                                                                                                                                                                                                                                                                                                                                                                                                                                                                                                                                                                                                                                                                                                                                                                                                                                                                                                                                                                                                                                                                                                                                                                                                                                                                                                                                 |
| Annexin A5                                               | Anxa5  | P48036 | U29396      | 3 |           | 166                                                                                                                                                                                                                                                                                                                                                                                                                                                                                                                                                                                                                                                                                                                                                                                                                                                                                                                                                                                                                                                                                                                                                                                                                                                                                                                                                                                                                                                                                                                                                                             |
| Glyceraldehyde-3-phosphate dehydrogenase                 | Gapd   | P16858 | M32599      | 2 | 2.3x10-2  |                                                                                                                                                                                                                                                                                                                                                                                                                                                                                                                                                                                                                                                                                                                                                                                                                                                                                                                                                                                                                                                                                                                                                                                                                                                                                                                                                                                                                                                                                                                                                                                 |
| Alpha enolase                                            | Eno1   | P17182 | AAH03891.1  | 2 |           | 72                                                                                                                                                                                                                                                                                                                                                                                                                                                                                                                                                                                                                                                                                                                                                                                                                                                                                                                                                                                                                                                                                                                                                                                                                                                                                                                                                                                                                                                                                                                                                                              |
| Catalase                                                 | Cat    | P24270 | M62897      | 1 |           | 66                                                                                                                                                                                                                                                                                                                                                                                                                                                                                                                                                                                                                                                                                                                                                                                                                                                                                                                                                                                                                                                                                                                                                                                                                                                                                                                                                                                                                                                                                                                                                                              |
| Malate dehydrogenase 2, NAD                              | Mdh2   | Q8R1P0 | BC023482    | 4 | 1.4x10-6  |                                                                                                                                                                                                                                                                                                                                                                                                                                                                                                                                                                                                                                                                                                                                                                                                                                                                                                                                                                                                                                                                                                                                                                                                                                                                                                                                                                                                                                                                                                                                                                                 |
| Transitional endoplasmic reticulum ATPase                | Vcp    | Q01853 | Z14044      | 7 | 7.8x10-17 |                                                                                                                                                                                                                                                                                                                                                                                                                                                                                                                                                                                                                                                                                                                                                                                                                                                                                                                                                                                                                                                                                                                                                                                                                                                                                                                                                                                                                                                                                                                                                                                 |
| Tumor rejection antigen gp96                             | Tra1   | Q91V38 | BC011439    | 7 | 9.3x10-14 |                                                                                                                                                                                                                                                                                                                                                                                                                                                                                                                                                                                                                                                                                                                                                                                                                                                                                                                                                                                                                                                                                                                                                                                                                                                                                                                                                                                                                                                                                                                                                                                 |
| Heat shock cognate 71 kDa protein                        | Hspa8  | P63017 | U27129      | 5 |           | 153                                                                                                                                                                                                                                                                                                                                                                                                                                                                                                                                                                                                                                                                                                                                                                                                                                                                                                                                                                                                                                                                                                                                                                                                                                                                                                                                                                                                                                                                                                                                                                             |
| Acidic ribosomal phosphoprotein P0                       | Arbp   | Q5FWB6 | BC089496    | 5 | 4.1x10-13 |                                                                                                                                                                                                                                                                                                                                                                                                                                                                                                                                                                                                                                                                                                                                                                                                                                                                                                                                                                                                                                                                                                                                                                                                                                                                                                                                                                                                                                                                                                                                                                                 |
| 60S acidic ribosomal protein P2                          | Rplp2  | P99027 | BC012413    | 2 | 2.4x10-5  |                                                                                                                                                                                                                                                                                                                                                                                                                                                                                                                                                                                                                                                                                                                                                                                                                                                                                                                                                                                                                                                                                                                                                                                                                                                                                                                                                                                                                                                                                                                                                                                 |
| 40S ribosomal protein SA                                 | Rpsa   | P14206 | NP_035159.2 | 7 | 1.6x10-17 |                                                                                                                                                                                                                                                                                                                                                                                                                                                                                                                                                                                                                                                                                                                                                                                                                                                                                                                                                                                                                                                                                                                                                                                                                                                                                                                                                                                                                                                                                                                                                                                 |
| Lamr1 protein                                            | Lamr1  | Q58E74 | BC092041    | 4 | 1x10-13   |                                                                                                                                                                                                                                                                                                                                                                                                                                                                                                                                                                                                                                                                                                                                                                                                                                                                                                                                                                                                                                                                                                                                                                                                                                                                                                                                                                                                                                                                                                                                                                                 |
| Protein disulfide-isomerase A4                           | Pdia4  | P08003 | AAA39907.1  | 5 | 1.4x10-11 |                                                                                                                                                                                                                                                                                                                                                                                                                                                                                                                                                                                                                                                                                                                                                                                                                                                                                                                                                                                                                                                                                                                                                                                                                                                                                                                                                                                                                                                                                                                                                                                 |
| Protein disulfide-isomerase                              | P4hb   | P09103 | X06453      | 5 | 9.8x10-11 |                                                                                                                                                                                                                                                                                                                                                                                                                                                                                                                                                                                                                                                                                                                                                                                                                                                                                                                                                                                                                                                                                                                                                                                                                                                                                                                                                                                                                                                                                                                                                                                 |
| Protein disulfide-isomerase A6                           | Pdia6  | Q922R8 | AK076558    | 3 | 5.8x10-16 |                                                                                                                                                                                                                                                                                                                                                                                                                                                                                                                                                                                                                                                                                                                                                                                                                                                                                                                                                                                                                                                                                                                                                                                                                                                                                                                                                                                                                                                                                                                                                                                 |
| Protein disulfide-isomerase A3                           | Pdia3  | P27773 | M73329      | 1 | 2.5x10-3  |                                                                                                                                                                                                                                                                                                                                                                                                                                                                                                                                                                                                                                                                                                                                                                                                                                                                                                                                                                                                                                                                                                                                                                                                                                                                                                                                                                                                                                                                                                                                                                                 |
| Vimentin                                                 | Vim    | P20152 | M24849      | 2 |           |                                                                                                                                                                                                                                                                                                                                                                                                                                                                                                                                                                                                                                                                                                                                                                                                                                                                                                                                                                                                                                                                                                                                                                                                                                                                                                                                                                                                                                                                                                                                                                                 |
